# Supplementary material for: Diversity in magnetic properties of 3D isomorphous networks of Co(ii) and Mn(ii) constructed by napthalene-1,4-dicarboxylate
Source: Royal Society of Chemistry journal article supplement (doi:10.1039/b507953e), 2005-01-01
Supplement: b507953e.pdf [file b507953e.pdf]

## Supporting Information

### Diversity in magnetic properties of 3D isomorphous networks of Co(II) and Mn(II) constructed by naphthalene-1,4-dicarboxylate

Tapas Kumar Maji,<sup>a</sup> Wakako Kaneko,<sup>a</sup> Masaaki Ohba<sup>a</sup> and Susumu kitagawa<sup>\*a</sup>

<sup>a</sup> Department of Synthetic and Biological Chemistry, Graduate School of Engineering, Kyoto University, Katsura, Nishikyo-ku, Kyoto, 615-8510, Japan. E-mail: [kitagawa@sbchem.kyoto-u.ac.jp](mailto:kitagawa@sbchem.kyoto-u.ac.jp); Fax: 81 75 383-2732

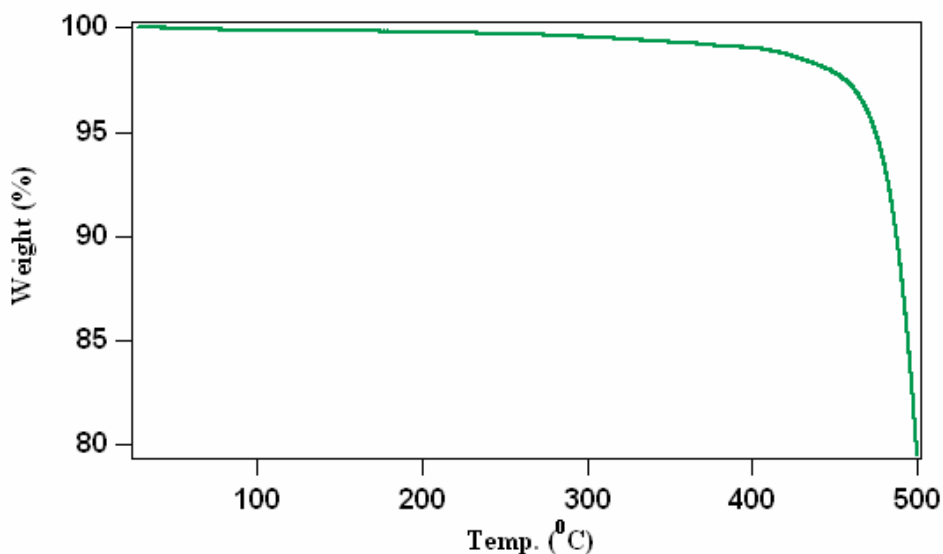

**Fig. SI (1):** TG analysis for **1** over the temperature range from 25- 500°C at a heating rate of  $\beta = 5^\circ\text{C}/\text{min}$  under the  $\text{N}_2$  atmosphere.

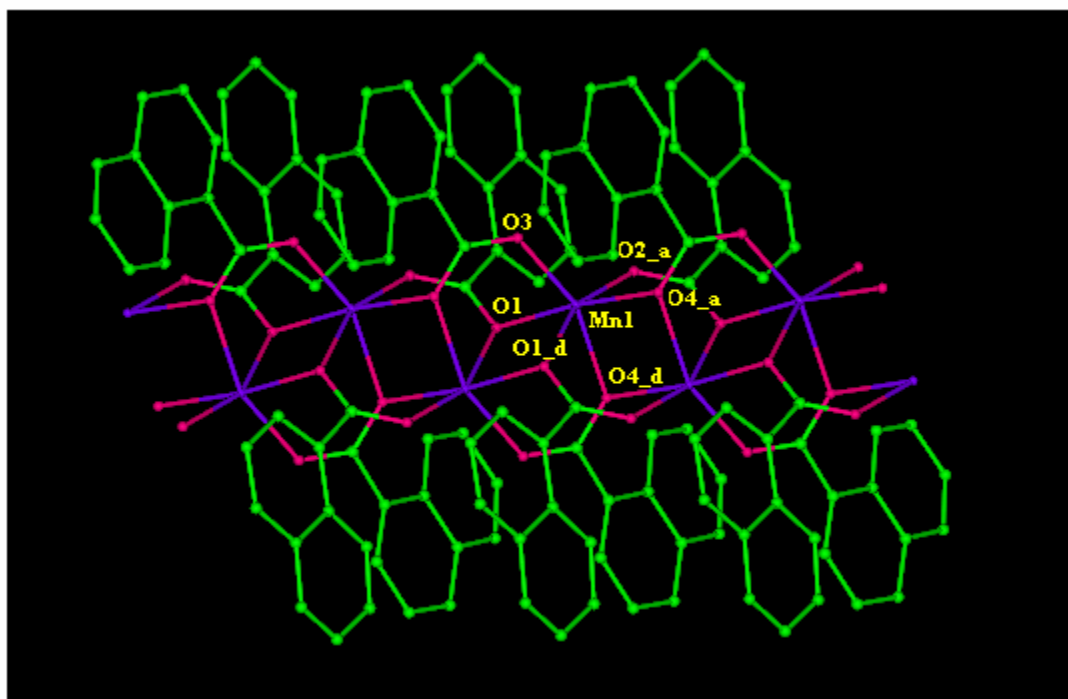

**Fig. SI (2a):** View of the coordination environment of Mn(II) and the building unit of  $[\text{Mn}-\mu\text{-O}_2]_n$  inorganic chain in **2**.

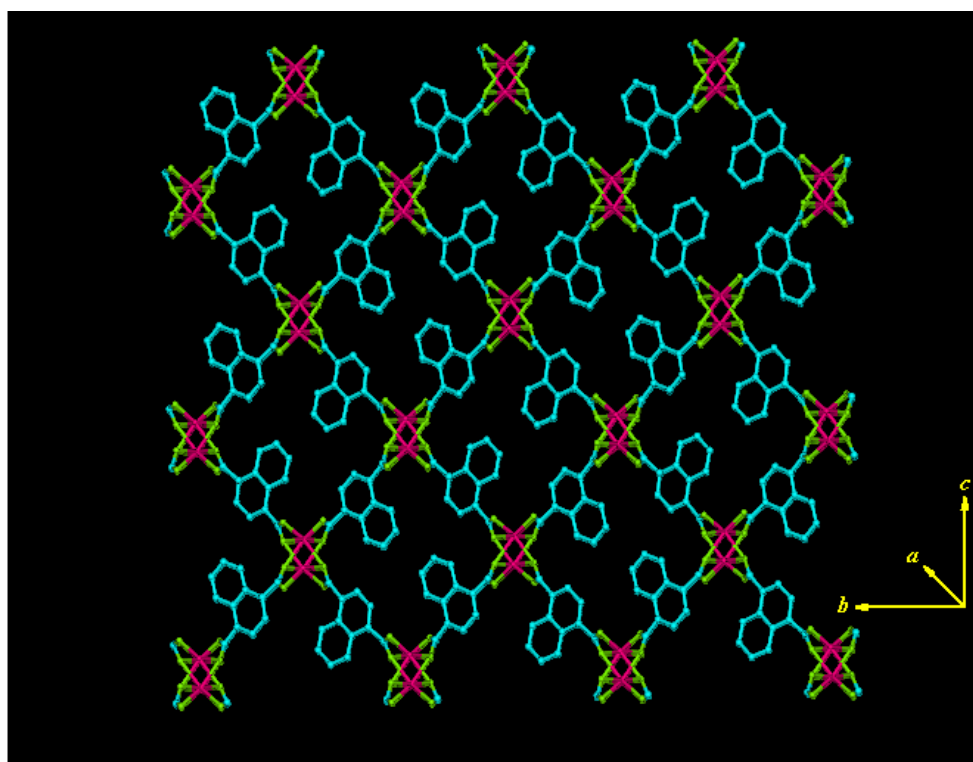

**Fig. SI (2b):** View of the 3D coordination framework of **2**.

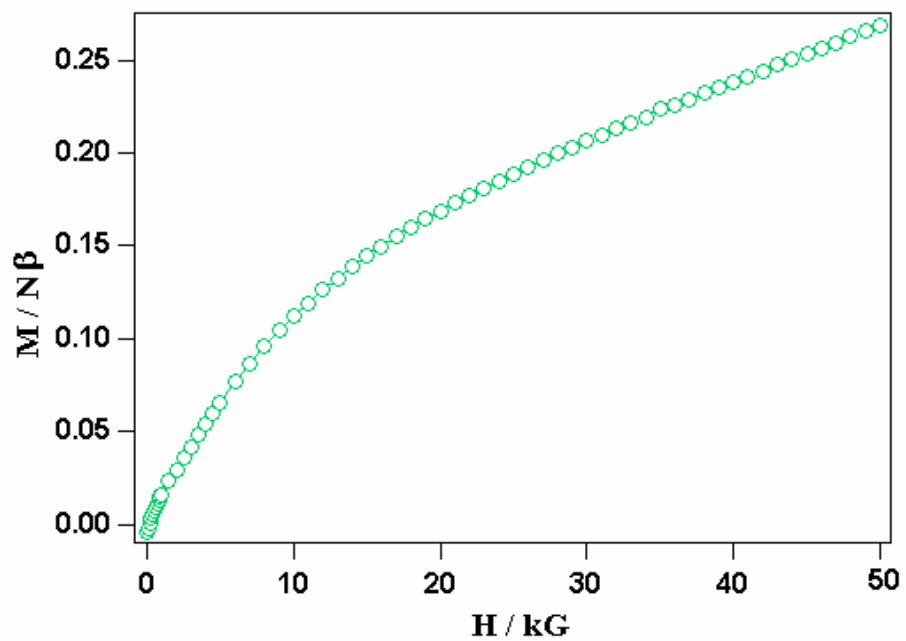

Fig. SI(3): magnetization vs. external magnetic field plots at 2K for 2.
